# Supplementary material for: The Impact of GLP-1 RAs and DPP-4is on Hospitalisation and Mortality in the COVID-19 Era: A Two-Year Observational Study
Source: MDPI journal article supplement (doi:10.3390/biomedicines11082292), 2023-08-18
Supplement: s1 [file s1]

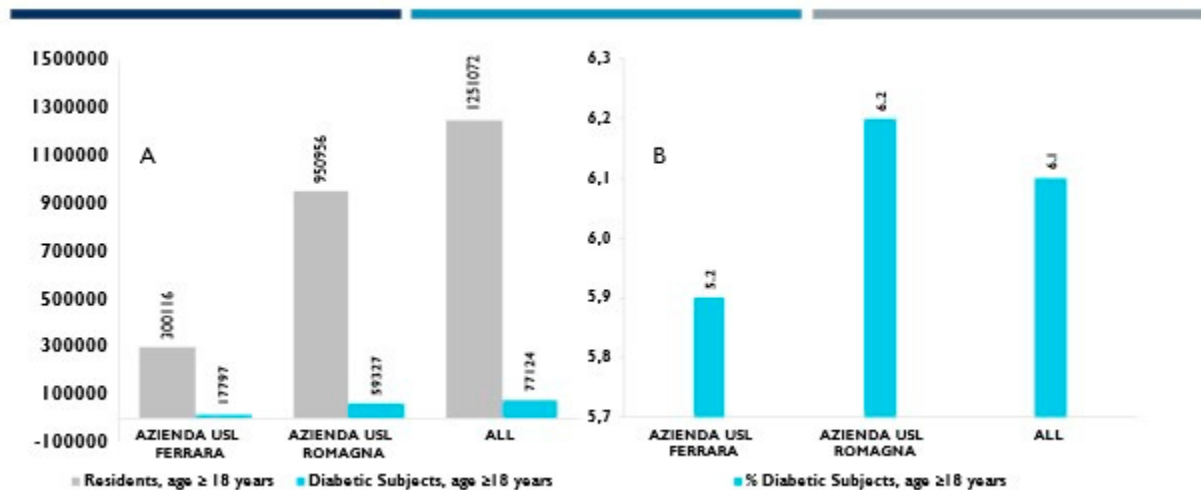

**Figure S1.** Prevalence of diabetes in the overall adult subjects in the districts of Ferrara and Romagna (Panel A), percentage of diabetic subjects in the districts of Ferrara and Romagna and overall average of diabetic subjects (Panel B)

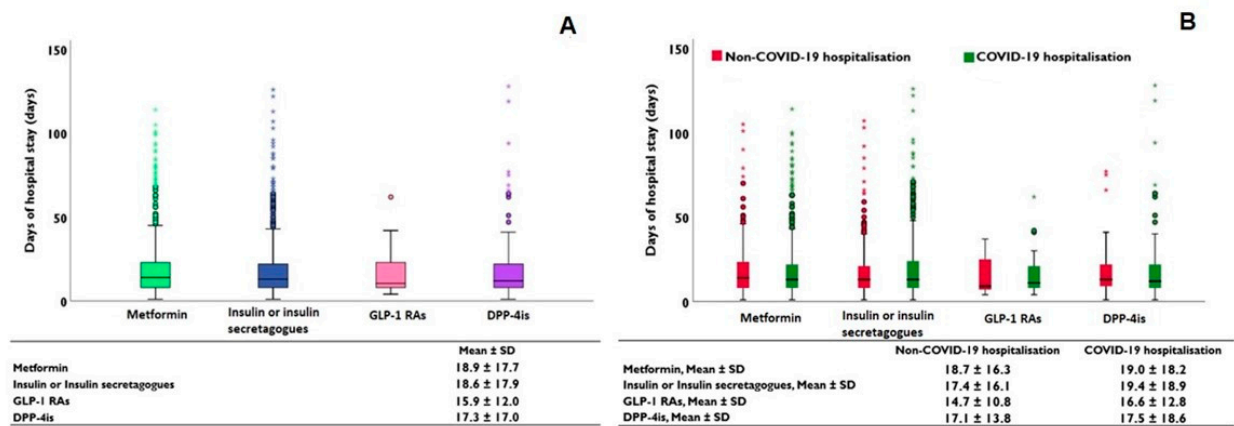

**Figure S2.** Evaluation of the length of stay in terms of days in the subgroup of patients treated with the four main antidiabetic treatments (Panel A); length of stay among the same four subgroups of inpatients and comparison between COVID-19 and non-COVID-19 subjects (Panel B)

**Table S1.** The institutions serving the districts of Ferrara and Romagna participating to the study

| <b>Institution</b>           | <b>District</b> | <b>City (Province)</b> |
|------------------------------|-----------------|------------------------|
| S. Anna Hospital             | Ferrara         | Cona (Ferrara)         |
| SS.ma Annunziata Hospital    | Ferrara         | Cento (Ferrara)        |
| Mazzolani-Vandini Hospital   | Ferrara         | Argenta (Ferrara)      |
| Ospedale del Delta           | Ferrara         | Lagosanto (Ferrara)    |
| Maurizio Bufalini Hospital   | Romagna         | Cesena (Forlì-Cesena)  |
| Morgagni-Pierantoni Hospital | Romagna         | Forlì (Forlì-Cesena)   |
| S. Maria delle Croci         | Romagna         | Ravenna (Ravenna)      |
| Ospedale degli Infermi       | Romagna         | Faenza (Ravenna)       |
| Umberto I Hospital           | Romagna         | Lugo (Ravenna)         |
| Ospedale Infermi             | Romagna         | Rimini (Rimini)        |
| Ceccarini Hospital           | Romagna         | Riccione (Rimini)      |

**Table S2.** MACEs and antidiabetic drugs

| <b>Antidiabetic treatment</b>                       | <b>Total</b> | <b>MI</b>           | <b>CVA</b>          | <b>HF</b>           | <b>MD</b> |
|-----------------------------------------------------|--------------|---------------------|---------------------|---------------------|-----------|
| Metformin. n (%)                                    | 30238        | 131 (0.4)           | 429 (1.4)           | 93 (0.3)            | 10 (0.0)  |
| Insulin or Insulin secretagogues. n (%)             | 14739        | 152 (1.0)           | 427 (2.9)           | 104 (0.7)           | 20 (0.1)  |
| GLP-1 RAs. n (%)                                    | 127          | 3 (2.4)             | 1 (0.8)             | 0 (0.0)             | 0 (0.0)   |
| GLP-1 RAs + Metformin. n (%)                        | 910          | 6 (0.7)             | 10 (1.1)            | 2 (0.2)             | 0 (0.0)   |
| GLP-1 RAs + Insulin or Insulin secretagogues. n (%) | 190          | 1 (0.5)             | 2 (1.1)             | 2 (1.1)             | 1 (0.5)   |
| DPP-4is. n (%)                                      | 1169         | 17 (1.5)            | 45 (3.8)            | 10 (0.9)            | 5 (0.4)   |
| DPP-4is + Metformin. n (%)                          | 2037         | 10 (0.5)            | 24 (1.2)            | 7 (0.3)             | 0 (0.0)   |
| DPP-4is + Insulin or Insulin secretagogues. n (%)   | 1095         | 24 (2.2)            | 42 (3.8)            | 12 (1.1)            | 0 (0.0)   |
| Other drug combinations or other drugs. n (%)       | 26259        | 229 (0.9)           | 490 (1.9)           | 93 (0.4)            | 14 (0.1)  |
|                                                     | <b>Total</b> | <b>2-point MACE</b> | <b>3-point MACE</b> | <b>4-point MACE</b> |           |
| Metformin. n (%)                                    | 30238        | 551 (1.8)           | 828 (2.7)           | 893 (3.0)           |           |
| Insulin or Insulin secretagogues. n (%)             | 14739        | 571 (3.9)           | 1214 (8.2)          | 1268 (8.6)          |           |
| GLP-1 RAs. n (%)                                    | 1227         | 23 (1.9)            | 37 (3.0)            | 39 (3.2)            |           |
| DPP-4is. n (%)                                      | 4301         | 160 (3.7)           | 358 (8.3)           | 370 (8.6)           |           |
| Other drug combinations or other drugs. n (%)       | 26259        | 702 (2.7)           | 1169 (4.5)          | 1224 (4.7)          |           |

Prevalence of singular MACEs in each subgroup of diabetic subjects according to their antidiabetic treatment (upper panel). Prevalence of 2-point MACE. 3-point MACE and 4-point MACE in the subgroups of patients treated with the 5 main antidiabetic drugs/combinations of drugs (lower panel); 2-point MACE (non-fatal MI, non-fatal CVA); 3-point MACE (non-fatal MI, non-fatal CVA, and HF with or without CS); 4-point MACE (non-fatal MI, non-fatal CVA, HF with or without CS, and MD).
